# Supplementary material for: Antioxidant Activity Evaluation and Assessment of the Binding Affinity to HSA of a New Catechol Hydrazinyl-Thiazole Derivative
Source: MDPI journal article supplement (doi:10.3390/antiox11071245), 2022-06-24
Supplement: s1 [file s1]

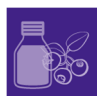

## Article

## Supplementary Material

## 1. Figures

## 1.1. The IR spectra

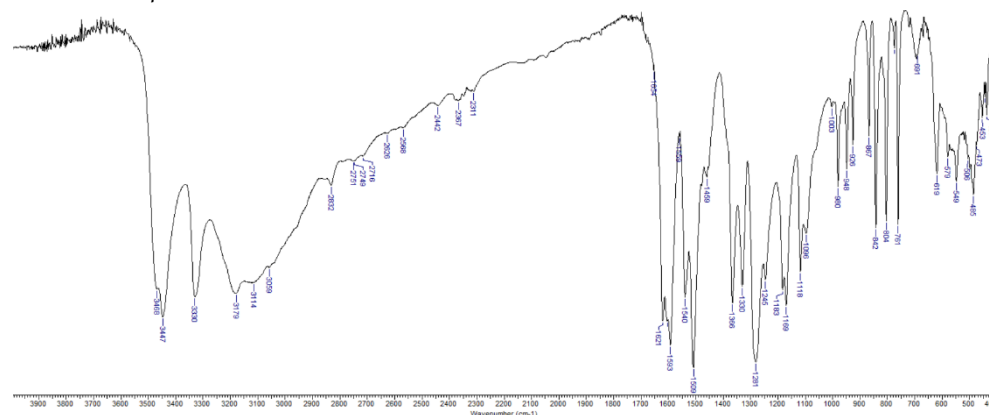

Figure S1. The IR spectrum for the compound 3.

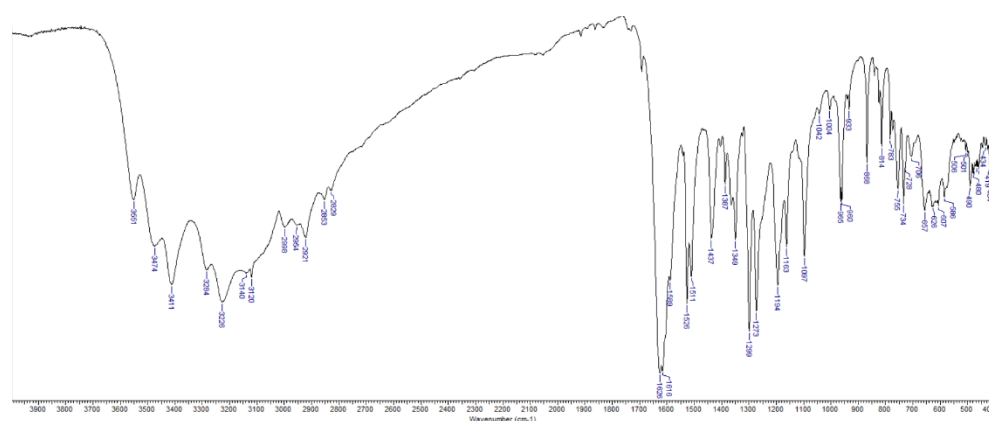

Figure S2. The IR spectrum for the compound 5.

## 1.2. The MS spectra

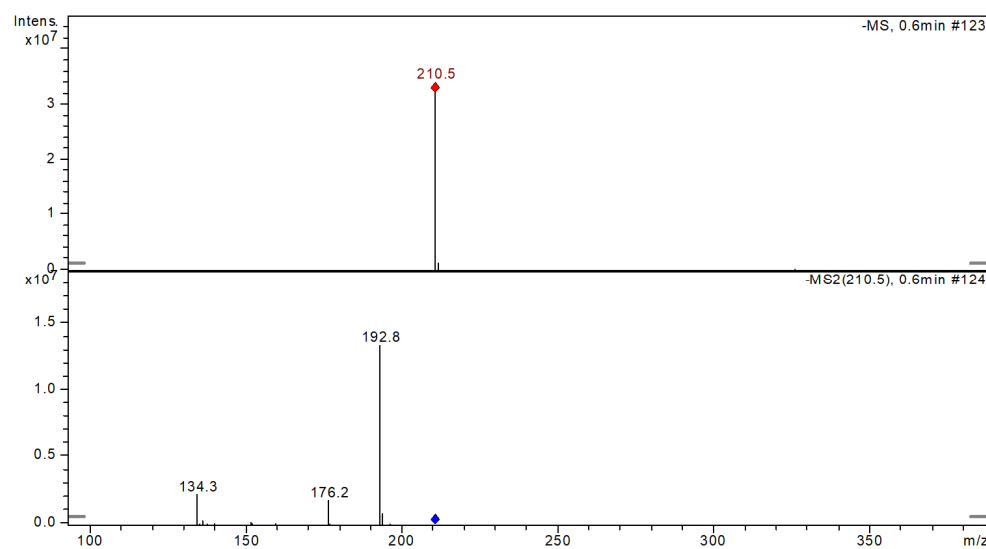

Figure S3. The MS spectrum for the compound 3.

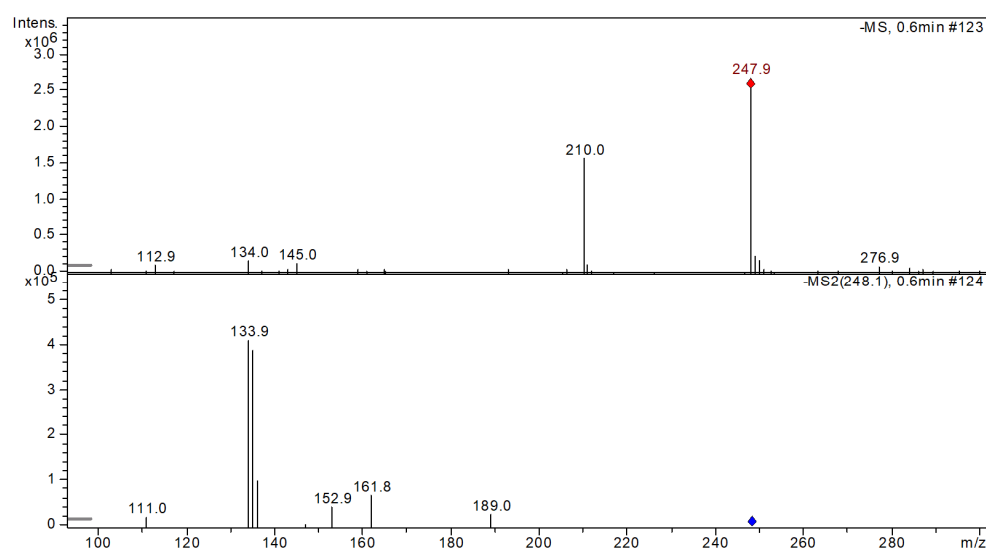

Figure S4. The MS spectrum for the compound 5.
